# Supplementary material
Source: ML conference proceedings conference paper supplement (https://openreview.net/forum?id=OzdrMWKDzS)
Supplement: supplementary_material [file attachment]

# SUPPLEMENTARY MATERIAL FOR: CATAGENT: MULTI-AGENT ORCHESTRATION FOR ELECTROCATALYST DISCOVERY

**Seokhyun Choung<sup>†</sup> Hoyun Kim<sup>†</sup> Jongheun Kim Jeong Woo Han\***

Department of Materials Science and Engineering, Research Institute of Advanced Materials,  
Seoul National University, Seoul, 08826, 1 Gwanak-ro, Gwanak-gu, Republic of Korea  
{schoung9967, hoyun423, olympic1234, jwhan98}@snu.ac.kr

## Contents

- Supplementary Table 1: Language models evaluated in this study
- Supplementary Figure 1: Symmetry-unique adsorption sites
- Supplementary Figure 2: Discovery efficiency vs. token consumption
- Supplementary Figure 3: Compositional and energetic profiles (overview)
- Supplementary Figure 4: Gemini 3 Flash discovery patterns (3 trials)
- Supplementary Figure 5: GPT-5.2 discovery patterns (3 trials)
- Supplementary Figure 6: GPT-4o mini discovery patterns (3 trials)
- Supplementary Figure 7: GPT-3.5 Turbo discovery patterns (3 trials)
- Supplementary Figure 8: Multi-adsorbate screening results for \*H
- Supplementary Figure 9: Multi-adsorbate screening results for \*CO
- Supplementary Figure 10: Multi-adsorbate screening results for \*NO
- Supplementary Figure 11: Multi-adsorbate screening results for \*O
- Supplementary Figure 12: Multi-adsorbate screening results for \*N
- Supplementary Figure 13: Reproducibility vs. discoverability across 13 models
- Supplementary Figure 14: Element frequency correlation across repeats
- Supplementary Figure 15: Cross-model element preference similarity

---

\*Corresponding author

<sup>†</sup>Equal contribution

Supplementary Table 1: Language models evaluated in this study. All 13 models were used for single-shot screening; models marked with † were additionally benchmarked in the iterative CatAgent workflow.

| Provider  | Model                       | Mode                   |
|-----------|-----------------------------|------------------------|
| Google    | Gemini 3 Flash <sup>†</sup> | Single-shot + CatAgent |
|           | Gemini 3 Pro                | Single-shot            |
|           | Gemini 2.5 Flash            | Single-shot            |
|           | Gemini 2.5 Pro              | Single-shot            |
| OpenAI    | GPT-5.2 <sup>†</sup>        | Single-shot + CatAgent |
|           | GPT-5                       | Single-shot            |
|           | GPT-5 mini                  | Single-shot            |
|           | GPT-5 nano                  | Single-shot            |
|           | GPT-4o mini <sup>†</sup>    | Single-shot + CatAgent |
|           | GPT-3.5 Turbo <sup>†</sup>  | Single-shot + CatAgent |
| Anthropic | Claude Opus 4.5             | Single-shot            |
|           | Claude Sonnet 4.5           | Single-shot            |
|           | Claude Haiku 4.5            | Single-shot            |

Token usage is reported as the sum of input and output tokens; cached tokens are excluded to ensure consistent comparison across providers. For  $L1_0$  compositions, symmetric pairs are considered equivalent and deduplicated within and across steps.

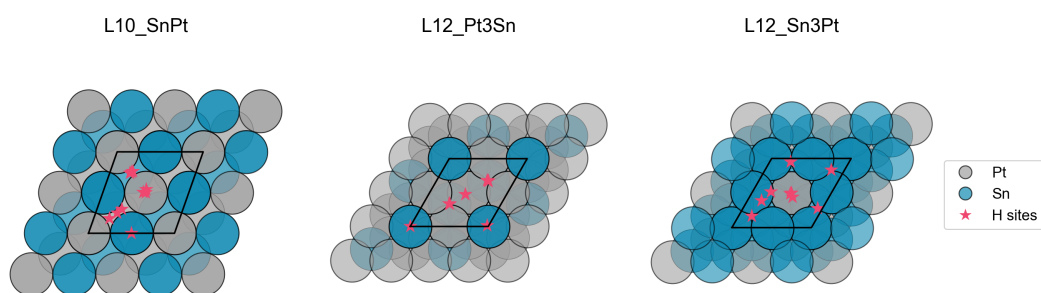

Supplementary Figure 1: Symmetry-unique adsorption sites enumerated for the  $L_{12}$  (9 sites) and  $L_{10}$  (10 sites) surface structures.

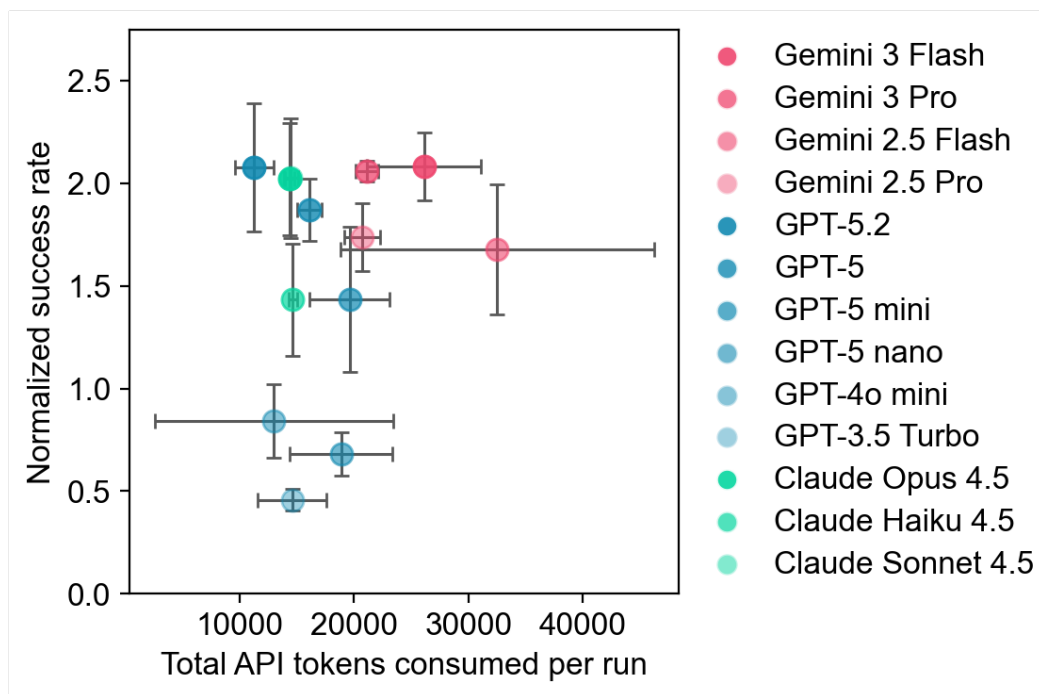

Supplementary Figure 2: Relationship between discovery efficiency (normalized success rate) and computational resource consumption (total API tokens per run) across the 13 language models in single-shot mode. Error bars: mean  $\pm$  s.d. ( $n = 3$ ).

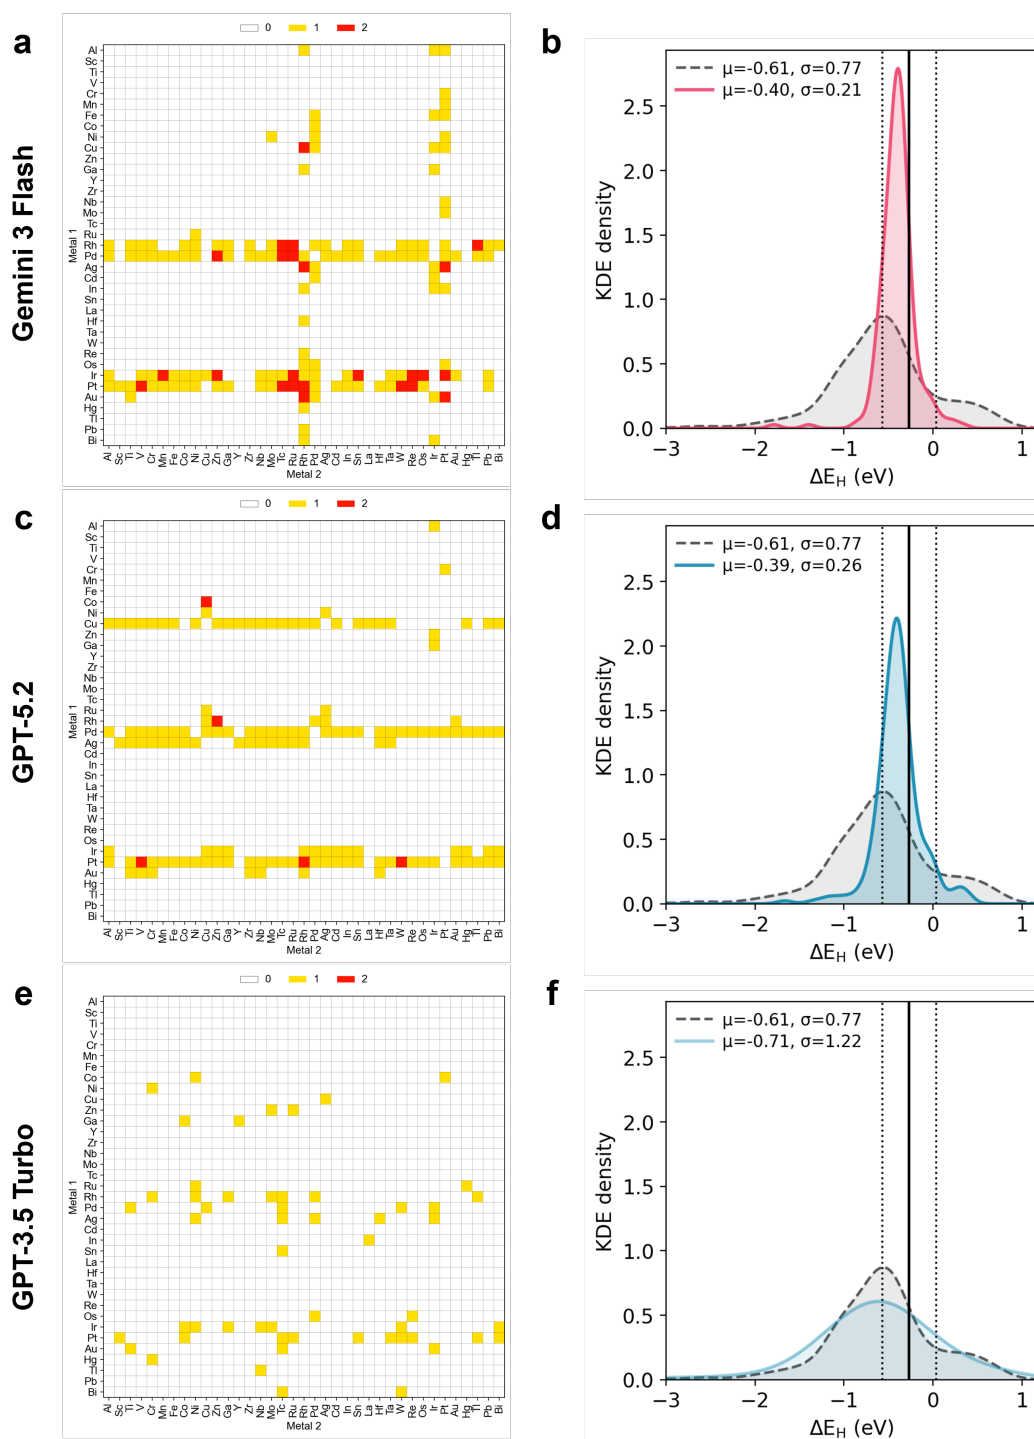

Supplementary Figure 3: (a, c, e) Heatmaps showing the composition distributions of candidates with adsorption energies within the energy threshold and (b, d, f) KDE plots showing the adsorption-energy distributions of all catalysts identified in one repeat of the critic-enabled CatAgent. (a,b) Gemini 3 Flash; (c,d) GPT-5.2; (e,f) GPT-3.5 Turbo.

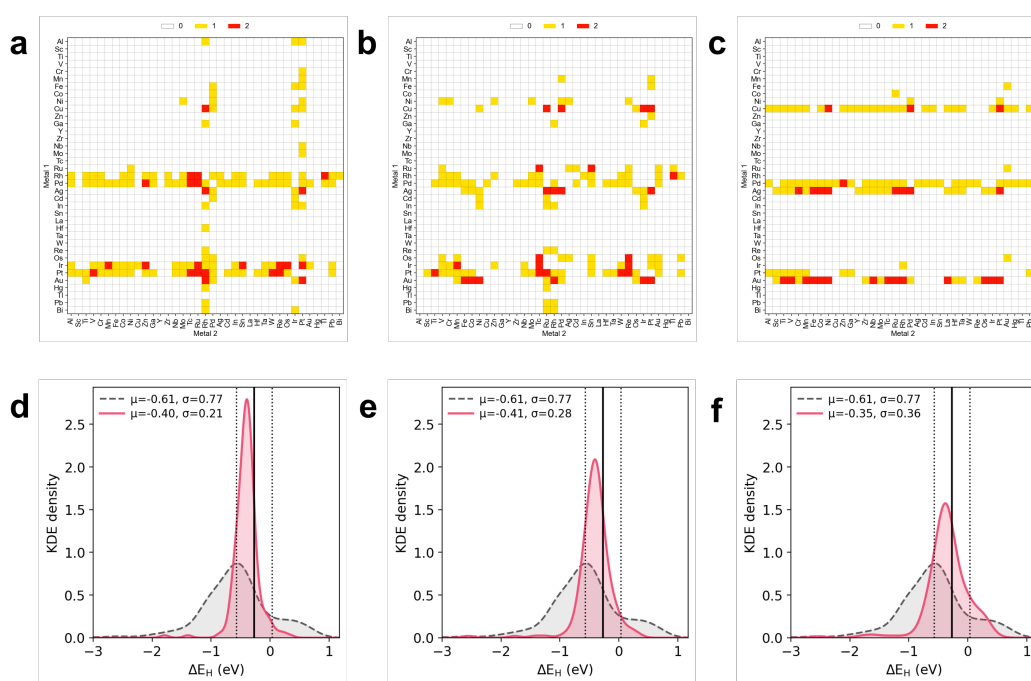

Supplementary Figure 4: Catalyst discovery patterns for Gemini 3 Flash using critic-enabled CatAgent across three independent trials. (a-c) composition heatmaps of successful candidates; (d-f) kernel density estimates of adsorption energy distributions for all explored candidates. (a,d) Trial 1, (b,e) Trial 2, (c,f) Trial 3.

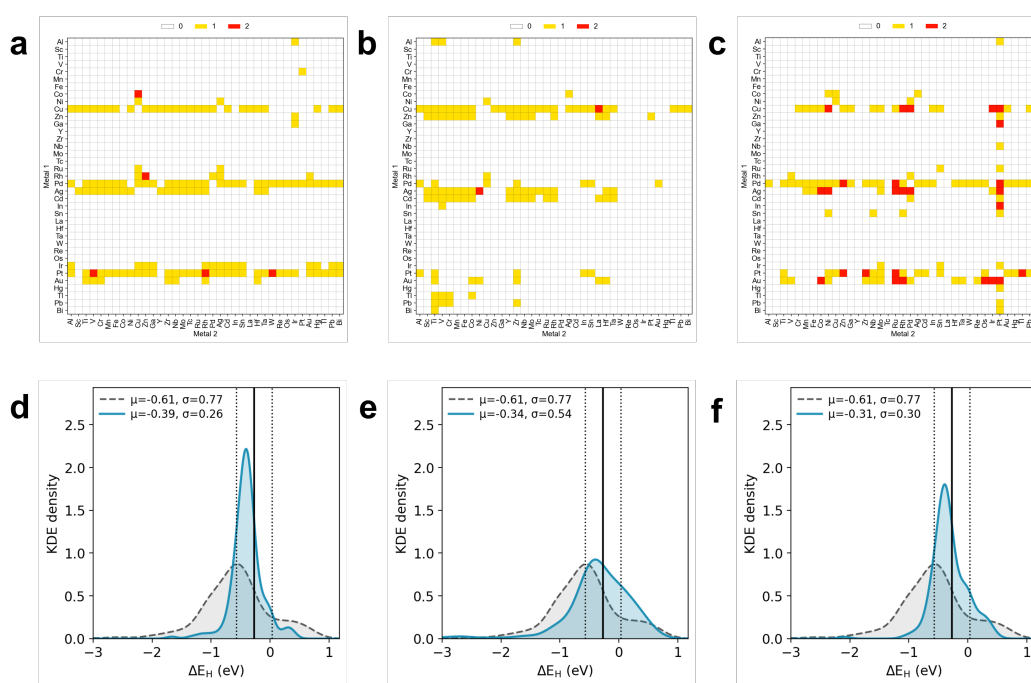

Supplementary Figure 5: Catalyst discovery patterns for GPT-5.2 using critic-enabled CatAgent across three independent trials. (a-c) composition heatmaps of successful candidates; (d-f) kernel density estimates of adsorption energy distributions for all explored candidates. (a,d) Trial 1, (b,e) Trial 2, (c,f) Trial 3.

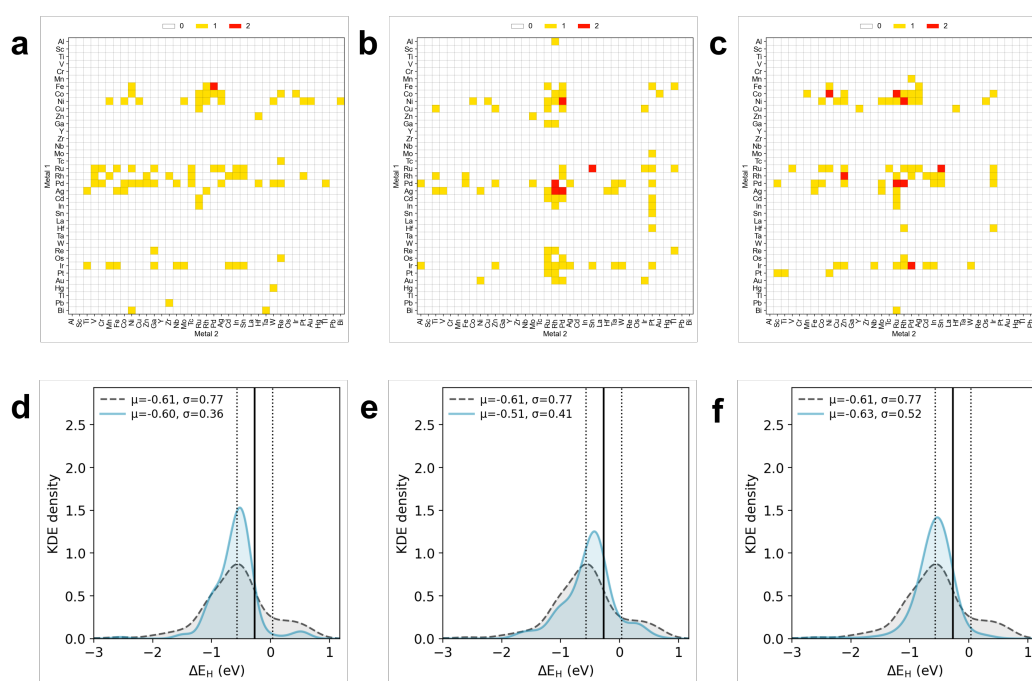

Supplementary Figure 6: Catalyst discovery patterns for GPT-4o mini using critic-enabled CatAgent across three independent trials. (a-c) composition heatmaps of successful candidates; (d-f) kernel density estimates of adsorption energy distributions for all explored candidates. (a,d) Trial 1, (b,e) Trial 2, (c,f) Trial 3.

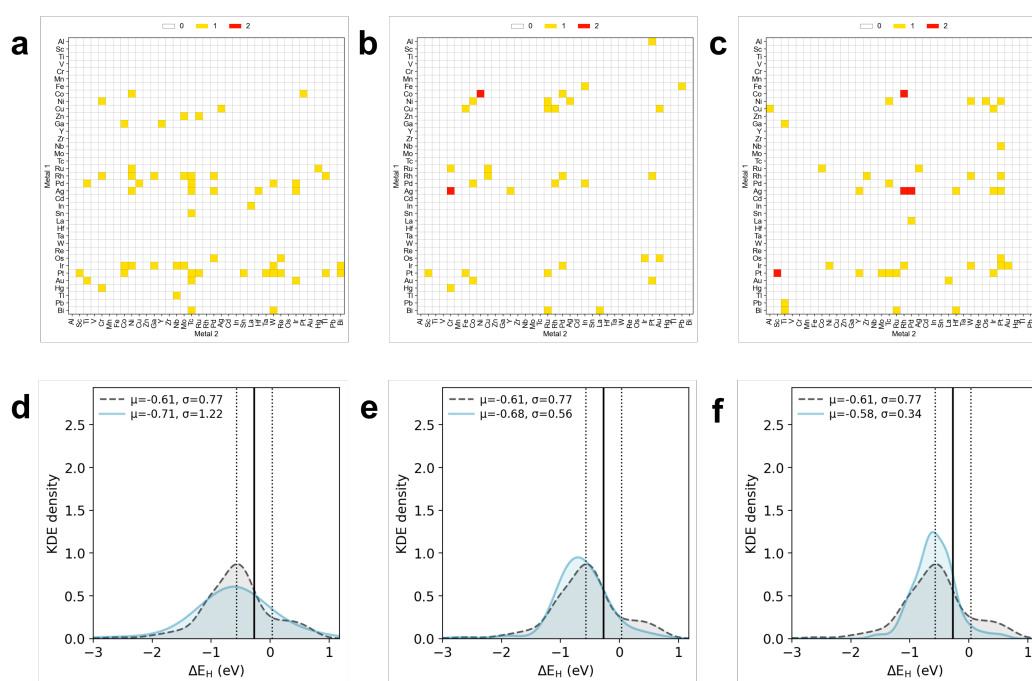

Supplementary Figure 7: Catalyst discovery patterns for GPT-3.5 Turbo using critic-enabled CatAgent across three independent trials. (a-c) composition heatmaps of successful candidates; (d-f) kernel density estimates of adsorption energy distributions for all explored candidates. (a,d) Trial 1, (b,e) Trial 2, (c,f) Trial 3.

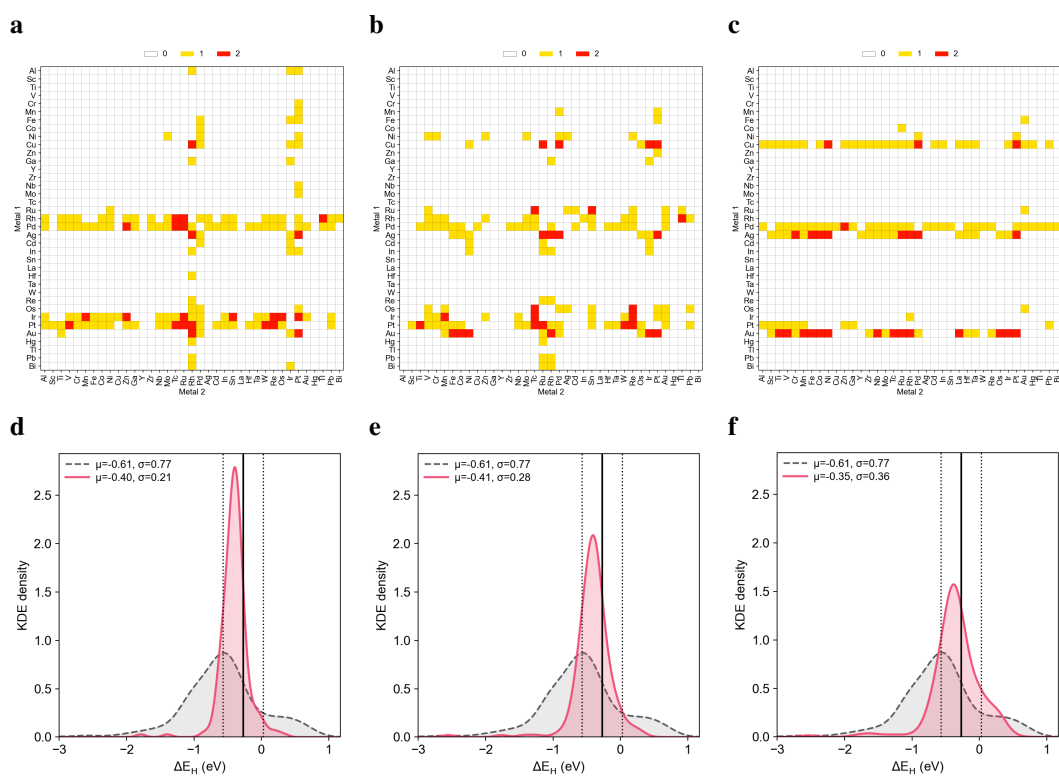

Supplementary Figure 8: CatAgent screening results for  $^*H$  adsorption across three independent trials. (a–c) Composition heatmaps of successful candidates; (d–f) kernel density estimates of adsorption energy distributions. (a,d) Trial 1, (b,e) Trial 2, (c,f) Trial 3.

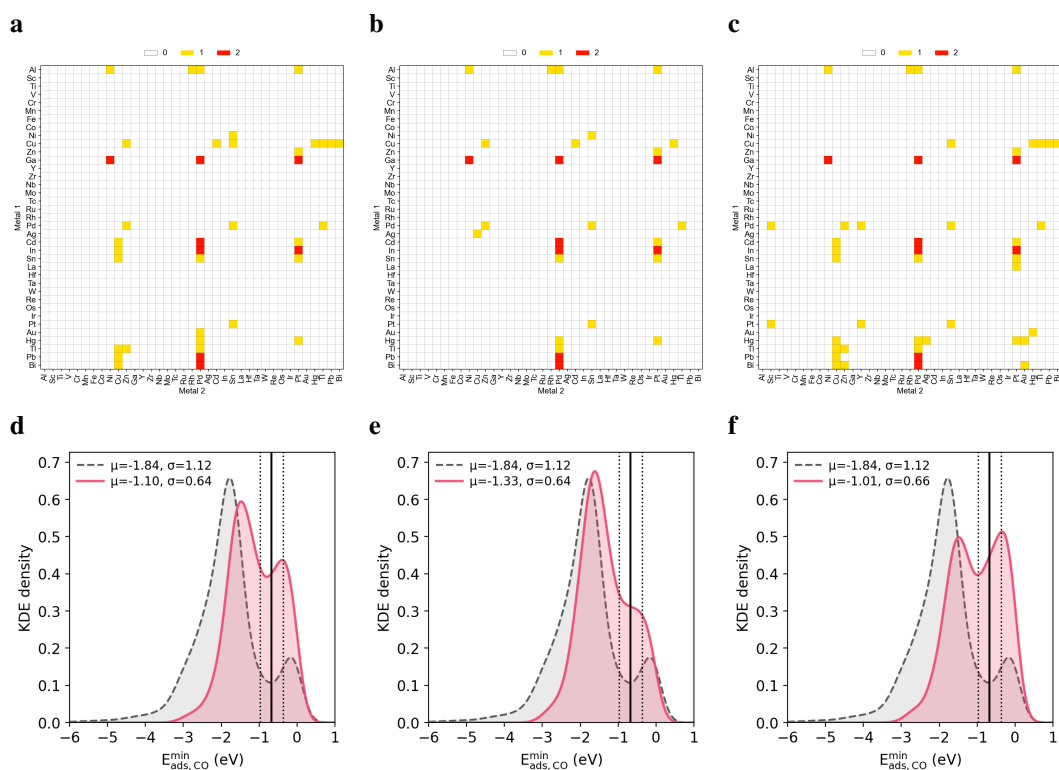

Supplementary Figure 9: CatAgent screening results for \*CO adsorption across three independent trials. (a–c) Composition heatmaps of successful candidates; (d–f) kernel density estimates of adsorption energy distributions. (a,d) Trial 1, (b,e) Trial 2, (c,f) Trial 3.

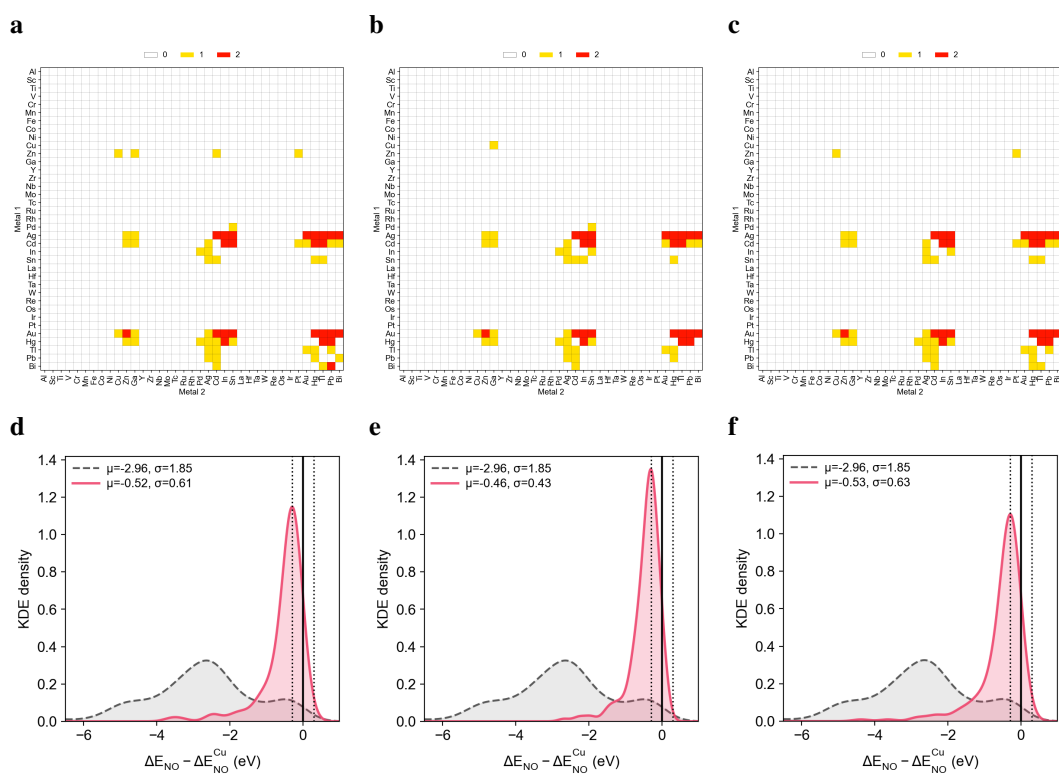

Supplementary Figure 10: CatAgent screening results for \*NO adsorption across three independent trials. (a–c) Composition heatmaps of successful candidates; (d–f) kernel density estimates of adsorption energy distributions. (a,d) Trial 1, (b,e) Trial 2, (c,f) Trial 3.



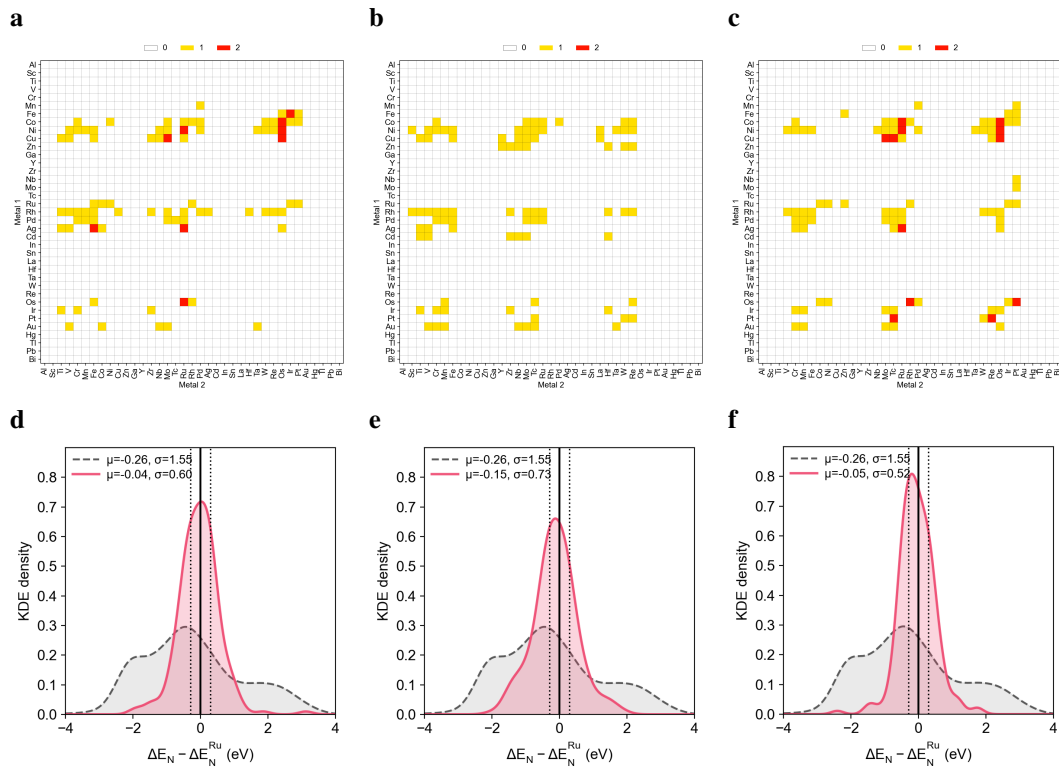

Supplementary Figure 12: CatAgent screening results for \*N adsorption across three independent trials. (a–c) Composition heatmaps of successful candidates; (d–f) kernel density estimates of adsorption energy distributions. (a,d) Trial 1, (b,e) Trial 2, (c,f) Trial 3.

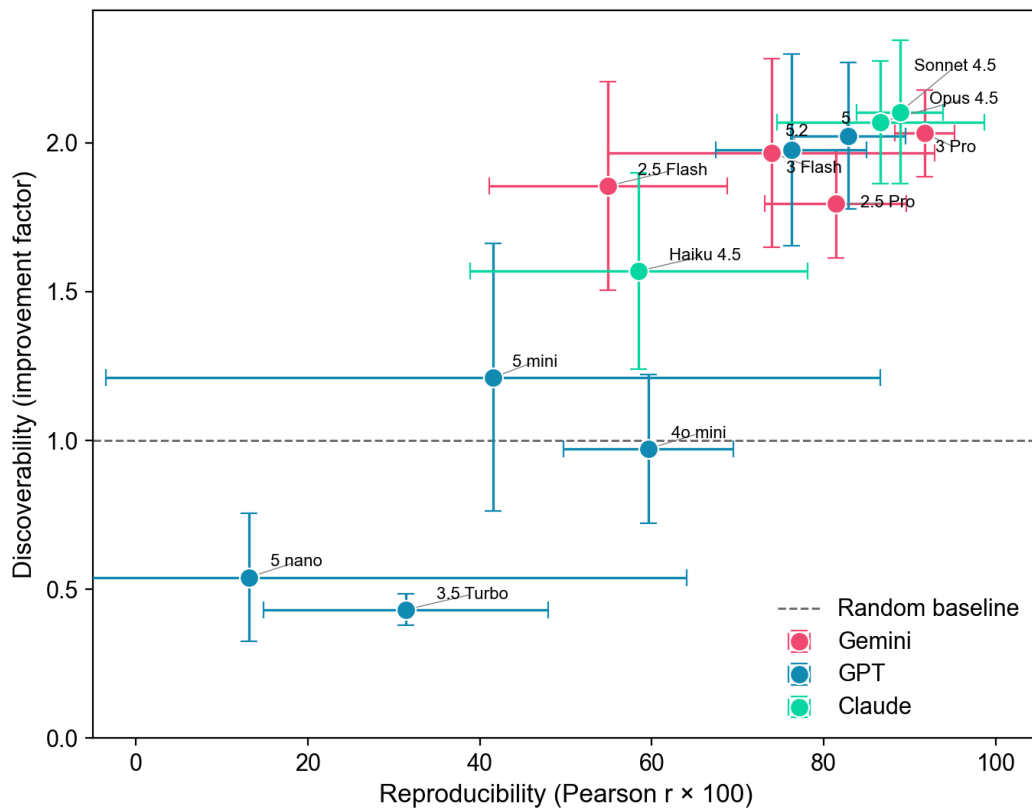

Supplementary Figure 13: Reproducibility versus discoverability for all 13 language models in single-shot mode ( $n = 5$  independent repeats). The  $x$ -axis shows the mean pairwise Pearson correlation of element selection frequencies across repeats; the  $y$ -axis shows the improvement factor over random baseline. Error bars indicate  $\pm 1$  s.d. across repeat pairs ( $x$ ) and repeats ( $y$ ). The dashed line marks the random baseline (improvement factor = 1.0). Models in the upper-right quadrant are both reproducible and effective.

Element frequency correlation across repeats (single-shot)

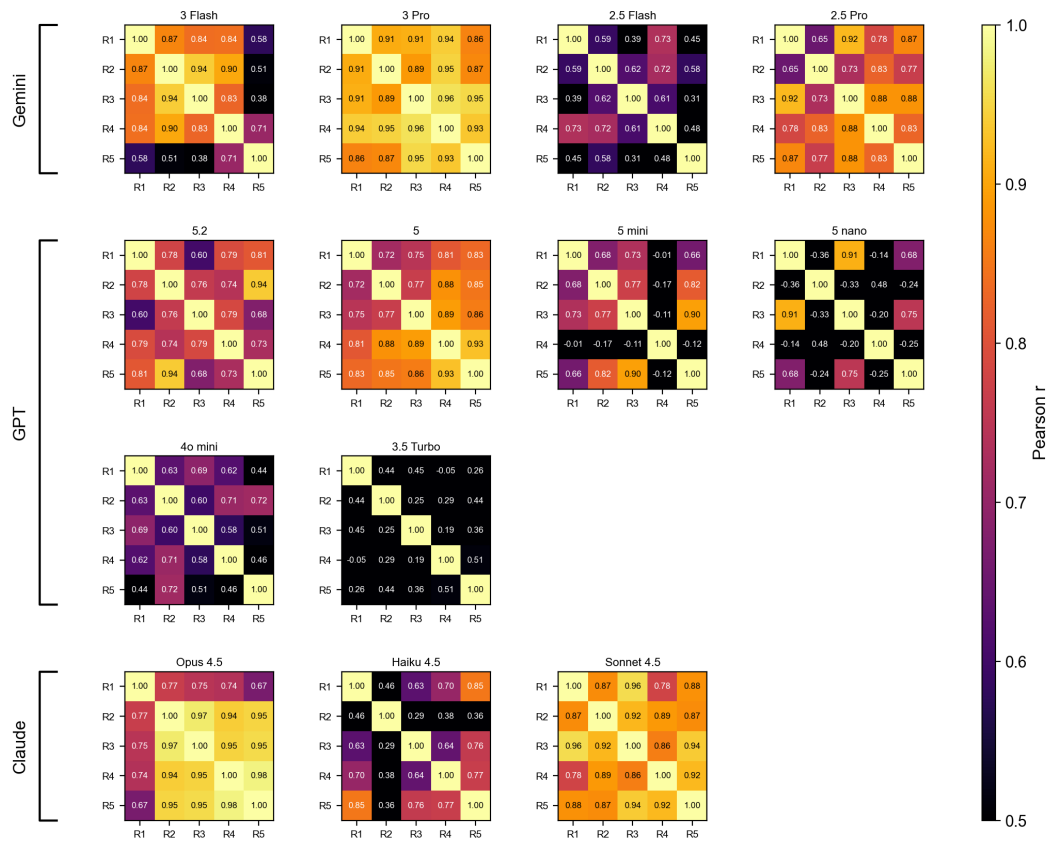

Supplementary Figure 14: Element frequency correlation across five independent repeats for each of the 13 language models in single-shot mode. Each  $5 \times 5$  matrix shows pairwise Pearson  $r$  between element selection frequency vectors of two repeats. Models are grouped by provider (Gemini, GPT, Claude). High-performing models (e.g., Opus 4.5, Sonnet 4.5, Gemini 3 Pro) show consistently high correlations ( $r > 0.9$ ), while low performers (e.g., GPT-5 nano, GPT-3.5 Turbo) show near-zero or negative correlations.

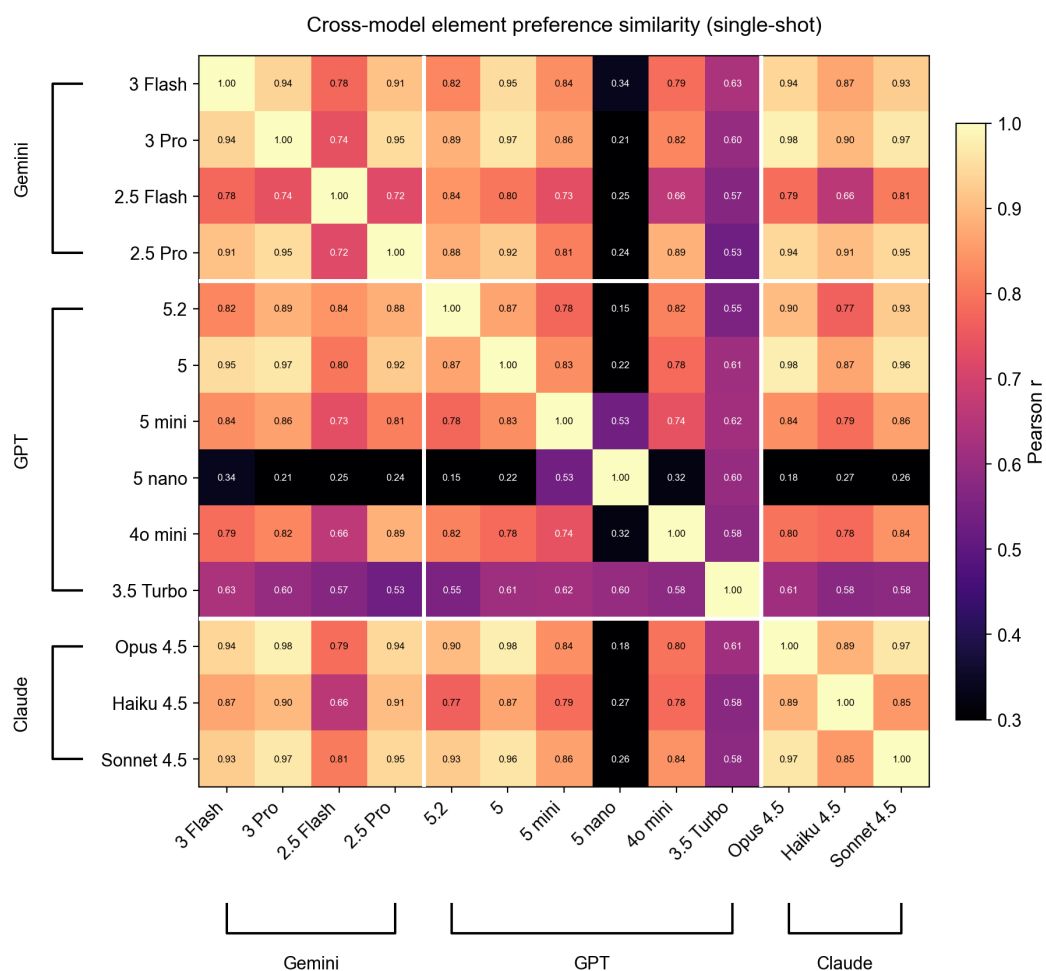

Supplementary Figure 15: Cross-model element preference similarity in single-shot mode. Each cell shows the Pearson  $r$  between two models' aggregated element selection frequency vectors (summed across five repeats and normalized). White lines separate provider groups. Most high-performing models show strong agreement ( $r > 0.8$ ) regardless of provider, while GPT-5 nano diverges from the consensus ( $r < 0.35$  against most models).
